# Supplementary material for: Exploring the stability and electronic structure of beryllium and sulphur co-doped graphene: a first principles study
Source: Royal Society of Chemistry journal article supplement (doi:10.1039/c6ra17640b), 2016-01-01
Supplement: c6ra17640b1.pdf [file c6ra17640b1.pdf]

## ./Job.out output for 176: Be S C30 (P1) ~ OBBe/Soptimisation\_4x4x1\_1 (VASP)

Status: **finished**

Startup is 'sourced'  
Opening the database  
MedeA db: 'C:/MD/Databases/MedeA.db'

### CALCULATION PROTOCOL:

- =====
1. Geometry optimization (atom positions)  
Saved properties in this step: charge density
  2. Calculate superposed atomic charge densities for difference charge density
  3. Total charge density and Bader charge analysis

### VASP parameters

=====

This is a calculation based on density functional theory and the GGA-PBE exchange-correlation functional for describing the interactions.

This is a non-magnetic calculation using 'normal' precision and a default planewave cutoff energy of 400.000 eV.

The electronic iterations convergence is 1.00E-005 eV using the Fast (Davidson and RMM-DIIS) algorithm and real space projection operators.

Explicit k-mesh of 6x6x1 used  
This corresponds to actual k-spacings of 0.123 x 0.123 x 0.449 per Angstrom.  
The k-mesh is forced to be centered on the gamma point.

Using Gaussian smearing with a width of 0.2 eV.

Other non-default parameters:  
(Pseudo, difference, spin) charge density is TRUE

=====

Using GGA-PBE / PAW potentials:

C  
Be  
S

There are 13 symmetry-unique k-points  
The plane wave cutoff is 400.00 eV

VASP energy: -277.426046 eV for BeSC30  
Initial VASP energy: -271.721770 eV for BeSC30  
Relaxation energy: -5.704276 eV gained after 23 optimization steps.

### Electronic contributions:

|             | Empirical Formula | Cell              |
|-------------|-------------------|-------------------|
|             | BeSC30            | BeSC30            |
| VASP Energy | -26767.538        | -26767.538 kJ/mol |

### Cell parameters:

| Parameter | Value      |
|-----------|------------|
| a         | 9.840000   |
| b         | 9.840000   |
| c         | 14.000000  |
| alpha     | 90.000000  |
| beta      | 90.000000  |
| gamma     | 120.000000 |

Volume 1173.948010 Ang<sup>3</sup>Density: 0.568 Mg/m<sup>3</sup>

The pressure given below is exerted by the system according to its volume.  
Positive pressure would cause expansion during full geometry optimization.

Pressure: 4.397 GPa  
= 43.970 kbar

| Stress: | XX      | YY      | ZZ    | XY     | YZ     | ZX         |
|---------|---------|---------|-------|--------|--------|------------|
|         | -6.451  | -7.316  | 0.576 | -0.000 | -0.000 | 0.749 GPa  |
| =       | -64.511 | -73.164 | 5.759 | -0.000 | -0.000 | 7.494 kbar |

The stress tensor above is imposed on the system, i.e. negative values of diagonal components would cause expansion of the corresponding lattice parameter upon full geometry optimization. The pressure and stress include only electronic terms, i.e. the vibrational, temperature and other terms are not included here.

## Fractional Coordinates:

| Atom | Initial Coordinates |        |        | Final Coordinates |        |        |
|------|---------------------|--------|--------|-------------------|--------|--------|
| C1   | 0.0833              | 0.1667 | 0.5000 | 0.0849            | 0.1675 | 0.5000 |
| C2   | 0.1667              | 0.0833 | 0.5000 | 0.1633            | 0.0763 | 0.5000 |
| C3   | 0.0833              | 0.4167 | 0.5000 | 0.0818            | 0.4184 | 0.5000 |
| C4   | 0.1667              | 0.3333 | 0.5000 | 0.1633            | 0.3370 | 0.5000 |
| C5   | 0.0833              | 0.6667 | 0.5000 | 0.0829            | 0.6665 | 0.5000 |
| C6   | 0.1667              | 0.5833 | 0.5000 | 0.1664            | 0.5846 | 0.5000 |
| C7   | 0.0833              | 0.9167 | 0.5000 | 0.0818            | 0.9134 | 0.5000 |
| C8   | 0.1667              | 0.8333 | 0.5000 | 0.1664            | 0.8317 | 0.5000 |
| C9   | 0.3333              | 0.1667 | 0.5000 | 0.3243            | 0.1439 | 0.5000 |
| C10  | 0.4167              | 0.0833 | 0.5000 | 0.4154            | 0.0750 | 0.5000 |
| C11  | 0.3333              | 0.4167 | 0.5000 | 0.3243            | 0.4304 | 0.5000 |
| Be1  | 0.4167              | 0.3333 | 0.5000 | 0.3839            | 0.3169 | 0.5000 |
| C13  | 0.3333              | 0.6667 | 0.5000 | 0.3327            | 0.6709 | 0.5000 |
| C14  | 0.4167              | 0.5833 | 0.5000 | 0.4154            | 0.5903 | 0.5000 |
| C15  | 0.3333              | 0.9167 | 0.5000 | 0.3327            | 0.9118 | 0.5000 |
| C16  | 0.4167              | 0.8333 | 0.5000 | 0.4179            | 0.8339 | 0.5000 |
| C17  | 0.5833              | 0.1667 | 0.5000 | 0.5849            | 0.1606 | 0.5000 |
| C18  | 0.6667              | 0.0833 | 0.5000 | 0.6698            | 0.0815 | 0.5000 |
| S1   | 0.5833              | 0.4167 | 0.5000 | 0.5820            | 0.4160 | 0.5000 |
| C20  | 0.6667              | 0.3333 | 0.5000 | 0.6792            | 0.3236 | 0.5000 |
| C21  | 0.5833              | 0.6667 | 0.5000 | 0.5849            | 0.6742 | 0.5000 |
| C22  | 0.6667              | 0.5833 | 0.5000 | 0.6792            | 0.6055 | 0.5000 |
| C23  | 0.5833              | 0.9167 | 0.5000 | 0.5846            | 0.9173 | 0.5000 |
| C24  | 0.6667              | 0.8333 | 0.5000 | 0.6698            | 0.8382 | 0.5000 |
| C25  | 0.8333              | 0.1667 | 0.5000 | 0.8358            | 0.1668 | 0.5000 |
| C26  | 0.9167              | 0.0833 | 0.5000 | 0.9201            | 0.0851 | 0.5000 |
| C27  | 0.8333              | 0.4167 | 0.5000 | 0.8402            | 0.4168 | 0.5000 |
| C28  | 0.9167              | 0.3333 | 0.5000 | 0.9190            | 0.3329 | 0.5000 |
| C29  | 0.8333              | 0.6667 | 0.5000 | 0.8402            | 0.6733 | 0.5000 |
| C30  | 0.9167              | 0.5833 | 0.5000 | 0.9183            | 0.5842 | 0.5000 |
| C31  | 0.8333              | 0.9167 | 0.5000 | 0.8358            | 0.9190 | 0.5000 |
| C32  | 0.9167              | 0.8333 | 0.5000 | 0.9190            | 0.8361 | 0.5000 |

## Analytic Derivatives:

| Atom | Derivatives fractional |         |        | Derivatives Cartesian (eV/Ang) |         |        |
|------|------------------------|---------|--------|--------------------------------|---------|--------|
| C1   | -0.0000                | -0.0000 | 0.0000 | -0.0004                        | -0.0002 | 0.0000 |
| C2   | -0.0004                | -0.0005 | 0.0000 | -0.0016                        | -0.0042 | 0.0000 |
| C3   | -0.0001                | 0.0008  | 0.0000 | -0.0045                        | 0.0070  | 0.0000 |
| C4   | -0.0004                | 0.0001  | 0.0000 | -0.0044                        | 0.0007  | 0.0000 |
| C5   | 0.0004                 | 0.0002  | 0.0000 | 0.0028                         | 0.0016  | 0.0000 |
| C6   | -0.0002                | -0.0001 | 0.0000 | -0.0015                        | -0.0008 | 0.0000 |
| C7   | -0.0001                | -0.0009 | 0.0000 | 0.0038                         | -0.0074 | 0.0000 |
| C8   | -0.0002                | -0.0001 | 0.0000 | -0.0014                        | -0.0009 | 0.0000 |
| C9   | -0.0001                | -0.0000 | 0.0000 | -0.0009                        | -0.0003 | 0.0000 |
| C10  | -0.0000                | -0.0011 | 0.0000 | 0.0050                         | -0.0091 | 0.0000 |
| C11  | -0.0001                | -0.0001 | 0.0000 | -0.0007                        | -0.0006 | 0.0000 |
| Be1  | 0.0001                 | 0.0001  | 0.0000 | 0.0008                         | 0.0004  | 0.0000 |
| C13  | 0.0003                 | 0.0014  | 0.0000 | -0.0041                        | 0.0122  | 0.0000 |
| C14  | -0.0000                | 0.0010  | 0.0000 | -0.0054                        | 0.0089  | 0.0000 |
| C15  | 0.0003                 | -0.0011 | 0.0000 | 0.0085                         | -0.0097 | 0.0000 |
| C16  | -0.0004                | -0.0002 | 0.0000 | -0.0029                        | -0.0016 | 0.0000 |
| C17  | -0.0003                | 0.0003  | 0.0000 | -0.0042                        | 0.0027  | 0.0000 |
| C18  | 0.0004                 | 0.0007  | 0.0000 | 0.0005                         | 0.0055  | 0.0000 |
| S1   | 0.0007                 | 0.0003  | 0.0000 | 0.0049                         | 0.0028  | 0.0000 |
| C20  | 0.0013                 | 0.0010  | 0.0000 | 0.0079                         | 0.0084  | 0.0000 |
| C21  | -0.0003                | -0.0006 | 0.0000 | 0.0002                         | -0.0050 | 0.0000 |
| C22  | 0.0013                 | 0.0003  | 0.0000 | 0.0112                         | 0.0027  | 0.0000 |
| C23  | 0.0008                 | 0.0004  | 0.0000 | 0.0056                         | 0.0032  | 0.0000 |
| C24  | 0.0004                 | -0.0003 | 0.0000 | 0.0051                         | -0.0023 | 0.0000 |

0.0129

maximum gradient =

|     |         |         |        |         |         |        |
|-----|---------|---------|--------|---------|---------|--------|
| C25 | -0.0001 | 0.0002  | 0.0000 | -0.0019 | 0.0019  | 0.0000 |
| C26 | -0.0005 | -0.0003 | 0.0000 | -0.0039 | -0.0023 | 0.0000 |
| C27 | -0.0012 | -0.0002 | 0.0000 | -0.0105 | -0.0017 | 0.0000 |
| C28 | -0.0002 | -0.0003 | 0.0000 | -0.0008 | -0.0023 | 0.0000 |
| C29 | -0.0012 | -0.0010 | 0.0000 | -0.0067 | -0.0082 | 0.0000 |
| C30 | 0.0002  | 0.0001  | 0.0000 | 0.0014  | 0.0008  | 0.0000 |
| C31 | -0.0001 | -0.0003 | 0.0000 | 0.0007  | -0.0026 | 0.0000 |
| C32 | -0.0002 | 0.0001  | 0.0000 | -0.0025 | 0.0004  | 0.0000 |

SUPERPOSITION OF ATOMIC CHARGE DENSITIES  
=====

TOTAL CHARGE DENSITY AND BADER CHARGE ANALYSIS  
=====

Fourier grid for calculations, so far: 48 x 48 x 70  
 Smallest Fourier grid avoiding aliasing: 66 x 66 x 90  
 Increase the Fourier grid by 0%  
 Fourier grid for total charge density: 66 x 66 x 90

Restarting from 176:./CHGCAR

Bader valence electron charges, charge transfer (relative to atoms) and Bader volumes:

| Atom   | Valence charge | Charge transfer | Volume (Ang^3) | Distance (Ang) |
|--------|----------------|-----------------|----------------|----------------|
| C1     | 4.0304         | -0.0304         | 13.0961        | 0.6426         |
| C2     | 3.8594         | 0.1406          | 12.1907        | 0.5893         |
| C3     | 4.1122         | -0.1122         | 12.6918        | 0.6172         |
| C4     | 4.0759         | -0.0759         | 12.7131        | 0.5893         |
| C5     | 3.8241         | 0.1759          | 11.7598        | 0.5911         |
| C6     | 3.9507         | 0.0493          | 12.4446        | 0.6358         |
| C7     | 4.1111         | -0.1111         | 12.4848        | 0.6348         |
| C8     | 3.9438         | 0.0562          | 12.4333        | 0.6000         |
| C9     | 4.5616         | -0.5616         | 17.5703        | 0.5325         |
| C10    | 3.9516         | 0.0484          | 12.2649        | 0.6395         |
| C11    | 4.5171         | -0.5171         | 17.3879        | 0.5733         |
| Be1    | 0.4430         | 1.5570          | 1.9346         | 0.4191         |
| C13    | 4.1496         | -0.1496         | 12.9434        | 0.6299         |
| C14    | 4.0213         | -0.0213         | 12.6842        | 0.5793         |
| C15    | 4.1500         | -0.1500         | 12.9866        | 0.6139         |
| C16    | 3.9920         | 0.0080          | 12.4037        | 0.5941         |
| C17    | 4.0208         | -0.0208         | 12.7085        | 0.5796         |
| C18    | 3.9867         | 0.0133          | 12.4732        | 0.5692         |
| S1     | 5.8010         | 0.1990          | 25.2542        | 0.7164         |
| C20    | 4.4503         | -0.4503         | 12.9823        | 0.6742         |
| C21    | 4.0301         | -0.0301         | 12.6545        | 0.5796         |
| C22    | 4.3064         | -0.3064         | 12.4692        | 0.6276         |
| C23    | 3.8278         | 0.1722          | 11.8832        | 0.5834         |
| C24    | 4.0020         | -0.0020         | 12.2795        | 0.5692         |
| C25    | 3.9480         | 0.0520          | 12.4333        | 0.6292         |
| C26    | 4.0766         | -0.0766         | 12.8921        | 0.6031         |
| C27    | 4.0264         | -0.0264         | 12.2822        | 0.5867         |
| C28    | 3.9661         | 0.0339          | 12.4579        | 0.5513         |
| C29    | 4.1303         | -0.1303         | 12.7161        | 0.6366         |
| C30    | 3.9241         | 0.0759          | 12.6545        | 0.5959         |
| C31    | 3.7493         | 0.2507          | 12.0676        | 0.5877         |
| C32    | 4.0111         | -0.0111         | 12.3647        | 0.6127         |
| Vacuum | 0.0496         | -0.0496         | 761.3851       |                |
| Total  | 128.0000       | 0.0000          | 1173.95        |                |

Job completed on Tue 05 April 2016 at 00:26:25 +0200 after 4649 s (1:17:29)
